# Supplementary material
Source: PubMed Central journal article supplement (PMC1276707)
Supplement: 7600824s1.pdf [file 7600824s1.pdf]

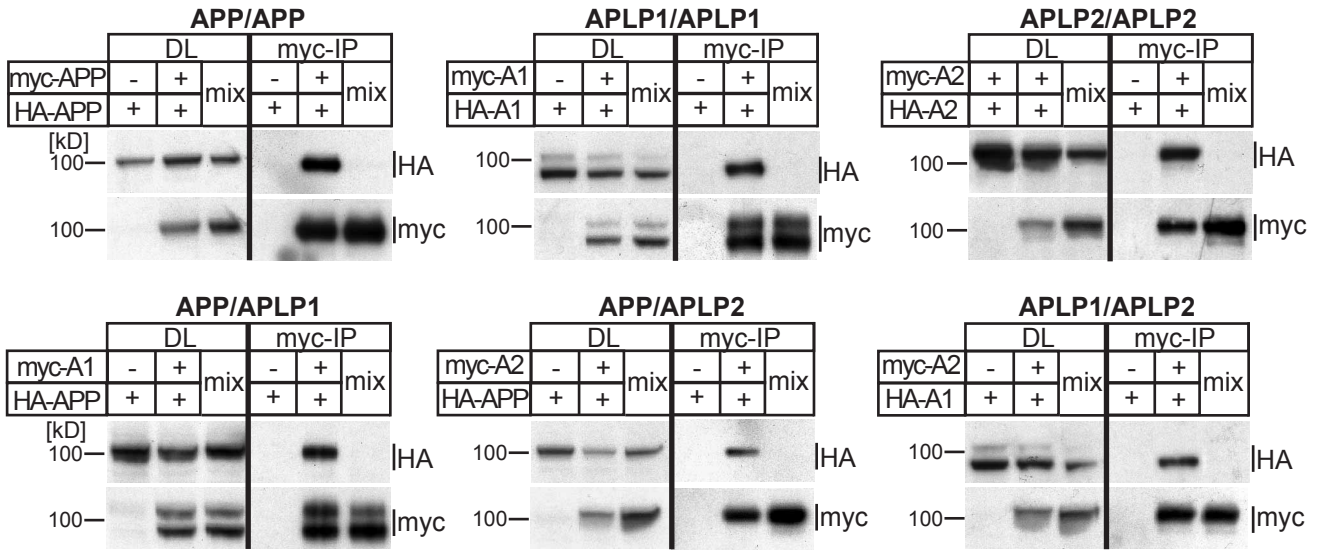

**Supplementary Fig. 1: Homo- and heterotypic interactions of APP and APLPs**  
 APP family protein interaction was analyzed by coimmunoprecipitation experiment as described in Fig. 1. Here, the reverse experiments were performed. For this purpose, the myc-tagged APP/APLP constructs were immunoprecipitated with anti-myc-Agarose and immunoblotted for the co-expressed corresponding HA-tagged APP/APLPs. Both, homo- and heterotypic interactions of APP family proteins were independent from the tag used.

□
