# Supplementary material
Source: PubMed Central journal article supplement (PMC1276707)
Supplement: 7600824s4.pdf [file 7600824s4.pdf]

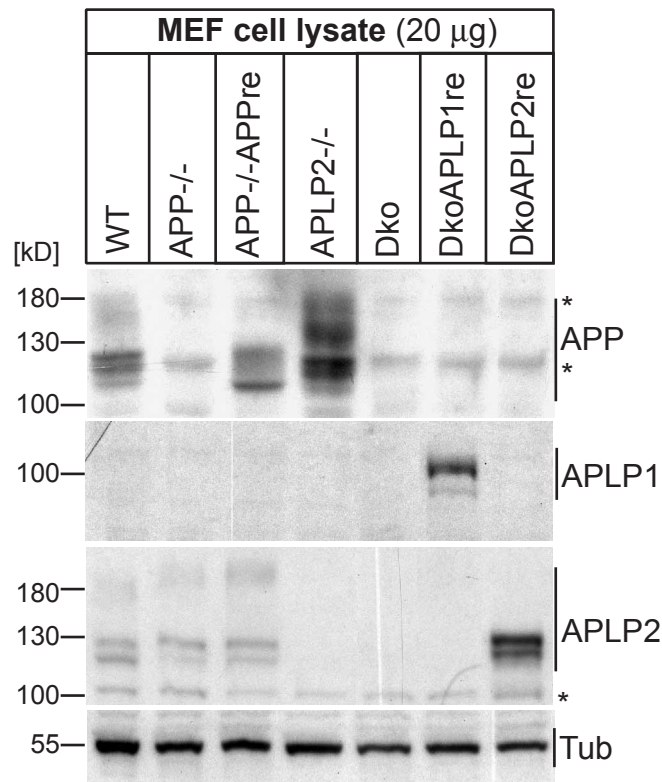

**Supplementary Fig. 4: Expression of APP/APLPs in mouse embryonic fibroblast (MEF) cell lines**

Wild type (WT), APP knockout (APP<sup>-/-</sup>), APLP2 knockout (APLP2<sup>-/-</sup>), or APP/APLP2 double knockout (Dko) MEF cells were analyzed for APP/APLP expression by western blotting. APP and APLP2 were present according to the genotype of the MEF cell line. No endogenous expression of APLP1 could be detected. However, expression of APP (APP<sup>-/-</sup>-APPre), APLP1 (DkoAPLP1re), and APLP2 (DkoAPLP2re) in retransfected clonal cell lines was confirmed. Tubulin (Tub) was used as a loading control. The asterisks indicate unspecific crossreactivity of the antibodies.
